# Supplementary material for: Is there a difference in physical activity levels in patients before and up to one year after unilateral total hip replacement? A systematic review and meta-analysis
Source: PubMed Central journal article supplement — Clin Rehabil. 2016 Oct 23;31(5):639–50. doi: 10.1177/0269215516673884 (PMC5407512; doi:10.1177/0269215516673884), 2016-10-23
Supplement: Appendix.pdf [file Appendix.pdf]

## **Appendix 1**

Appendix 1: Example search.

1. Hip
2. Arthroplasty
3. Replacement
4. Arthroplast\*
5. 2 or 3 or 4
6. Exercise
7. Sport
8. Physical activity
9. Physical therap\*
10. Walking
11. 6 or 7 or 8 or 9 or 10
